# Supplementary material
Source: PubMed Central journal article supplement (PMC6050064)
Supplement: AET2-2-221-s001.pdf [file AET2-2-221-s001.pdf]

**Patocka et al., AEM Education & Training**  
**Data Supplement S1. Guide for one-on-one semi-structured interview**  
**regarding the ALiEM Paucis Verbis (PV) cards**

*Demographic information:*

The participants name will be used to contact them and conduct the interview. We will also collect information regarding the participant's designation (medical student, resident, or staff) and level of training (# of elective/clerkship weeks in emergency medicine for medical students, year of residency for residents and years in practice for attending staff)

*Interview length:* 20 minutes

***Interview script:***

---

**Introduction:**

*Hello, my name is \_\_\_\_\_ and I am one of the ALiEM PV card fellows. I will be conducting this semi-structured interview today. The interview should take approximately 20 minutes of your time.*

*As with any research project, we are expected to maintain a standard of confidentiality. We are conducting this research as a quality improvement initiative for the Paucis Verbis (PV) cards. Our goal is to gain insight into the use of point of care resources and use this information to try and make the PV cards as user-friendly as possible. We will be recording the interviews to minimize loss of valuable qualitative data and in order to enable transcription. Your privacy is very important to us. Following transcription of the interviews, any information that is collected will be anonymized and de-identified. The original interview data will be kept in a locked filing cabinet on the encrypted password protected USB drive of one of the researchers and will be kept for a period of 5 years, which is required by the University of Calgary. Destruction of physical and electronic data will be done in accordance with Alberta Health Services (AHS) and University of Calgary procedures. We will be using an internet-based video/audio conference system to conduct this interview so you should be aware that should the session be hacked or violated by external persons your participation in this study or anything you say may become open to others. We feel that this should cause no undue burden or hardship on you as we are not asking you to provide any personal information today. Are there any questions about anything I have said thus far? Please remember that you can opt out of this study at any time.*

*Prior to beginning we also have to disclose a potential conflict of interest. The ALiEM PV card fellowship is offered in conjunction with AgileMD the for-profit company that produces the iOS and android app (two platforms through which the PV cards are offered). Although as fellows we do not receive any direct remuneration for our work, there is a stipend that allows us to travel to conferences and take educational design courses. We do not believe that this arrangement will cause undue influence on our project but prefer to disclose it to all of our participants. AgileMD has not and will not have any input into the design, administration and analysis of this quality improvement initiative.*

**Patocka et al., AEM Education & Training**  
**Data Supplement S1. Guide for one-on-one semi-structured interview**  
**regarding the ALiEM Paucis Verbis (PV) cards**

Thank you for taking the time to sit down with me to discuss the PV cards today!

1. **Main question:** Do you use POC resources in the ED?

***Follow-up question:*** For the purposes of our study we define a POC resource as any reference material used in the provision of medical care which may include but is not limited to clinical problem-solving, patient care, patient education and/or learner education. Does that change your answer to the first question?

***Intent statement:*** As this is the first question of the interview it is broad and open-ended. This question will help the interviewer establish the participant's experience with the central phenomenon (POC resources in the ED) and is intentionally left open-ended to get a sense of what participants consider a POC resource (without imposing the definition that the researchers have developed). We believe that participants may consider a POC resource only a resource that is used in patient-care and in the follow-up/probe statement we clarify that we mean any resource used in all aspects of work within the ED to see whether this changes their answer.

2. **Main question:** Which POC resources do you use?

***Follow-up questions:*** Why, how, and for what purpose do you use these POC resources? Do you use the PV cards from ALiEM?

3. **Main question:** What tasks do you accomplish using PV cards in the ED?

***Follow-up question:*** What tasks would you LIKE to accomplish using PV cards in the ED?

4. **Main question:** Who else have you seen using the PV cards in the ED?

5. **Main question:** What are barriers to your use of the PV cards in the ED?

***Follow-up question:*** What are barriers to use of POC resources in the ED?

6. **Main question:** As a PV card user in the ED, what are your needs?

***Follow-up question:*** As a POC user in the ED, what are your needs?

***Intent statement:*** We are interested in understanding how people use the PV cards and what other resources people are using and why and questions 2- 5 are variations of several of the sub-questions within the research protocol.

### **Wrap-up**

Interviewer briefly summarizes the conversation and allows the participant to clarify or add information.

***Wrap-up Question:*** Who should I speak with to learn more about my questions?

**Patocka et al., AEM Education & Training**  
**Data Supplement S1. Guide for one-on-one semi-structured interview**  
**regarding the ALiEM Paucis Verbis (PV) cards**

*Thank you for your responses and for your time, we really appreciate your participant in the project, and we hope that as part of our work today we can make the PV cards an even more amazing resource for you to use in the future!*
